# Supplementary material
Source: HighWire-hosted journal article supplement (https://drc.bmj.com/content/suppl/2020/11/02/8.2.e001668)
Supplement: bmjdrc-2020-001668supp001_data_supplement.pdf [file bmjdrc-2020-001668supp001_data_supplement.pdf]

**Supplementary figure.** Flow chart detailing missing data and follow-up intervals.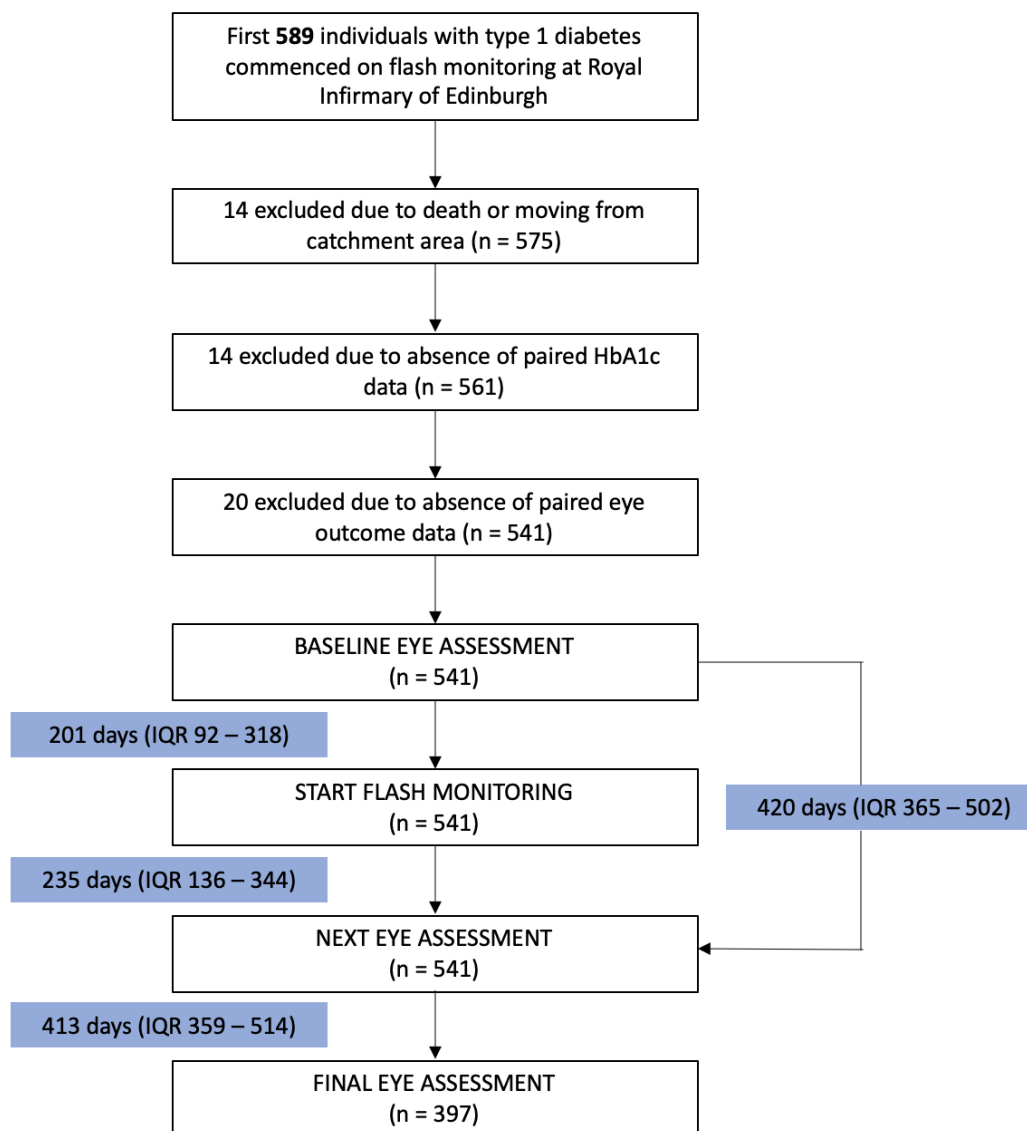

**Supplementary Table 1.** HbA1c and hypoglycaemia data following flash monitoring commencement stratified by HbA1c response. p refers to comparison between HbA1c response groups. Optimal bolus timing refers to people taking bolus insulin at least 15 minutes prior to meals.

|                                                        | Total cohort<br>N = 541            | HbA1c fall 10<br>mmol/mol (0.9%) or<br>greater<br>N = 135 | HbA1c change less<br>than -10mmol/mol<br>(0.9%)<br>N = 406 | p      |
|--------------------------------------------------------|------------------------------------|-----------------------------------------------------------|------------------------------------------------------------|--------|
| Baseline HbA1c<br>(mmol/mol / %)                       | 63 (55 – 72) / 7.9<br>(7.2 – 8.7)  | 72 (65 – 83) / 8.7 (8.1 –<br>9.7)                         | 61 (53 – 67) /<br>7.7 (7.0 – 8.3)                          | <0.001 |
| Change in HbA1c<br>(mmol/mol / %)                      | -4 (-9 – 1) / 0.4 (-<br>0.8 – 0.1) | -16 (-21 – -12) /<br>1.5 (-1.9 – -1.1)                    | -2 (-5 – 2) /<br>0.2 (-0.5 – 0.2)                          | <0.001 |
| Interval baseline to<br>next HbA1c (days)              | 384 (260 – 608)                    | 399 (286 – 607)                                           | 376 (252 – 606)                                            | 0.533  |
| Optimal bolus timing                                   | 126/350 (36.0%)                    | 40/89 (44.9%)                                             | 86/261 (33.0%)                                             | 0.042  |
| Severe hypo last year?                                 | 40/356 (11.2%)                     | 13/89 (14.6%)                                             | 27/267 (10.1%)                                             | 0.245  |
| Symptomatic hypo<br>more than weekly                   | 159/347 (45.8%)                    | 36/89 (40.4%)                                             | 123/258 (47.4%)                                            | 0.238  |
| Asymptomatic hypo<br>frequency once /<br>month or more | 101/348 (29.0%)                    | 26/87 (29.9%)                                             | 75/261 (28.7%)                                             | 0.838  |
| Impaired awareness<br>hypoglycaemia?                   | 45/347 (13.0%)                     | 14/88 (15.9%)                                             | 31/259 (12.0%)                                             | 0.342  |

**Supplementary Table 2.** Univariate comparison of clinical features by worsening retinopathy and new-onset retinopathy at final follow-up assessment.

|                                     | Worsening retinopathy                                          | No worsening retinopathy                                             | p      | New retinopathy                                                | No new retinopathy                                                | p      |
|-------------------------------------|----------------------------------------------------------------|----------------------------------------------------------------------|--------|----------------------------------------------------------------|-------------------------------------------------------------------|--------|
| Male gender                         | 36/72 (50.0%)                                                  | 174/325 (53.5%)                                                      | 0.586  | 27/58 (46.6%)                                                  | 72/146 (49.3%)                                                    | 0.721  |
| Age (years)                         | 46 (35 – 62)                                                   | 46 (34 – 57)                                                         | 0.585  | 46 (34 – 60)                                                   | 47 (32 – 59)                                                      | 0.983  |
| Age at diagnosis (years)            | 15 (10 – 25)                                                   | 19 (11 – 31)                                                         | 0.103  | 15 (10 – 26)                                                   | 26 (15 – 38)                                                      | <0.001 |
| Diabetes duration (years)           | 26 (17 – 37)                                                   | 23 (12 – 34)                                                         | 0.028  | 25 (15 – 37)                                                   | 14 (8 – 29)                                                       | <0.001 |
| Baseline HbA1c (mmol/mol / %)       | 64 (54 – 74)<br>8.0 (7.1 – 8.9)                                | 63 (56 – 70)<br>7.9 (7.3 – 8.6)                                      | 0.684  | 62 (52 – 73)<br>7.8 (6.9 – 8.8)                                | 61 (55 – 68)<br>7.7 (7.2 – 8.4)                                   | 0.527  |
| Change in HbA1c (mmol/mol / %)      | -5 (-12 – 1)<br>-0.5 (-1.1 – 0.1)                              | -4 (-9 – 0)<br>-0.4 (-0.8 – 0)                                       | 0.384  | -4 (-12 – 1)<br>-0.4 (-1.1 – 0.1)                              | -3 (-9 – 1)<br>-0.3 (-0.8 – 0.1)                                  | 0.609  |
| HbA1c fall 10mmol/mol (0.9%)        | 23/72 (31.9%)                                                  | 80/325 (24.6%)                                                       | 0.199  | 17/58 (29.3%)                                                  | 36/146 (24.7%)                                                    | 0.494  |
| CSII                                | 22/72 (30.6%)                                                  | 93/325 (28.6%)                                                       | 0.743  | 17/58 (29.3%)                                                  | 41/146 (28.1%)                                                    | 0.861  |
| Any retinopathy present at baseline | 16/72 (22.2%)                                                  | 177/325 (54.5%)                                                      | <0.001 | NA                                                             | NA                                                                | NA     |
| Any maculopathy present at baseline | 16/72 (22.2%)                                                  | 54/325 (16.6%)                                                       | 0.259  | NA                                                             | NA                                                                | NA     |
| PRP at baseline                     | 9/72 (12.5%)                                                   | 39/325 (12.0%)                                                       | 0.906  | NA                                                             | NA                                                                | NA     |
| Macular laser at baseline           | 8/72 (11.1%)                                                   | 17/325 (5.2%)                                                        | 0.063  | NA                                                             | NA                                                                | NA     |
| Anti-VEGF at baseline               | 3/72 (4.2%)                                                    | 5/325 (1.5%)                                                         | 0.331  | NA                                                             | NA                                                                | NA     |
| Composite at baseline               | 15/72 (20.8%)                                                  | 44/325 (13.5%)                                                       | 0.115  | NA                                                             | NA                                                                | NA     |
| Smoking status                      | Current 6/65 (9.2%)<br>Ex 17/65 (26.2%)<br>Never 42/65 (64.6%) | Current 35/302 (11.6%)<br>Ex 71/302 (23.5%)<br>Never 196/302 (64.9%) | 0.809  | Current 4/52 (7.7%)<br>Ex 11/52 (21.2%)<br>Never 37/52 (71.2%) | 12/137 (8.8%)<br>37/137 (27.0%)<br>88/137 (64.2%)                 | 0.660  |
| Albumin status                      | Macro 5/60 (8.3%)<br>Micro 4/60 (6.7%)<br>None 51/60 (85.0%)   | Macro 9/292 (3.1%)<br>Micro 25/292 (8.6%)<br>None 258/292 (88.4%)    | 0.154  | Macro 4/48 (8.3%)<br>Micro 1/48 (2.1%)<br>None 43/48 (89.6%)   | Macro 7/132 (5.3%)<br>Micro 11/132 (8.3%)<br>None 114/132 (86.4%) | 0.268  |
